# Supplementary material
Source: PubMed Central journal article supplement (PMC5288830)
Supplement: AEM.02725-16_zam999117652s1.pdf [file AEM.02725-16_zam999117652s1.pdf]

1 **Supplemental Material for:** Applied and Environmental Microbiology

2

3 **New arsenate reductase gene (*arrA*) PCR primers for diversity assessment**  
4 **and quantification in environmental samples**

5

6 Babur S. Mirza<sup>1\*</sup>, Darwin L. Sorensen<sup>1</sup>, R. Ryan Dupont<sup>1,2</sup>, Joan E. McLean<sup>1,2\*</sup>

7

8

9

10 <sup>1</sup>Utah Water Research Laboratory, Utah State University, Logan, UT 84322-8200,  
11 USA

12 <sup>2</sup>Department of Civil and Environmental Engineering, Utah State University, Logan,  
13 UT 84322-8200, USA

14

15 **Keywords:** Arsenate reductase gene (*arrA*), High throughput sequencing, qPCR of  
16 *arrA* gene

17

18

19

20 **Address correspondence to:** Babur S. Mirza, babur.mirza@usu.edu, or

21

Joan E. Mclean, joan.mclean@usu.edu

22

<sup>1</sup>Utah State University

23

Utah Water Research Laboratory

24

8200 Old Main Hill,

25

Logan UT 84322-8200.

26

Tel: (435) 797-3199

27

Fax: (435) 797 3663

28

29

30

31

32 **Supplementary Figures:**

33 **Fig. S1:** Maximum-likelihood phylogenetic tree based on partial sequences (630 bp)  
34 of the arsenate reductase genes (*arrA*) of the 54 *arrA* gene clones previously  
35 generated (Mirza et al., 2014) and of 463 *arrA* gene sequences both from cultured  
36 and uncultured organisms from GenBank. These 54 *arrA* gene clones were  
37 evaluated for the successful amplification of this gene using the newly developed  
38 PCR primers. Sequences from other studies were collapsed into OTUs (at 90%  
39 identity) to show the overall relationships of these clusters to our clone sequences.  
40 Numbers at branch nodes reflect the maximum likelihood bootstrap support values.  
41 The *psrA* gene from *Wolinella succinogenes* (X65042) was used as an out-group.

42 **Fig. S2:** (A) The DNA sequence identities of the newly developed *arrA* gene primers  
43 with the *arrA* gene sequences from five different pure culture isolates. (B) Overall  
44 *arrA* gene region showing the presence of the conserved region with these five  
45 isolates at the newly developed primer sites.

46 **Fig. S3:** Translated amino acid sequence identities of the newly developed *arrA* gene  
47 primers with the *arrA* gene sequences from different pure culture isolates.

48 **Fig. S4:** PCR amplification of *ArrA* gene using the newly developed PCR primers  
49 from *arrA* gene clones, soil and groundwater samples. DNA ladder (1kb) was  
50 presented in the right most lane.

51 **Fig. S5:** Maximum-likelihood phylogenetic analysis of translated amino acids of  
52 partial *arrA* gene sequences along with the other arsenite oxidase and Mo-containing  
53 proteins sequences.

54 **Fig. S6:** Multidimensional scaling plot based on the Bray-Curtis similarity index at  
55 90% *arrA* gene identity showed differences in the arsenate reducing microbial  
56 species between soil and groundwater well samples from Cache Valley sites.

57 **Fig. S7:** Nonmetric multidimensional scaling plots representing different groundwater  
58 quality parameters of the Cache Valley Basin (CVB) domestic wells based on the  
59 Euclidean distance matrix. The four samples that have been associated with the

60 Logan landfill site were not included from this analysis. Length and direction of  
61 arrows indicate the strength and nature of association of different water quality  
62 parameters, respectively.

63

#### 64 **Supplemental Table:**

65 **Table S1:** Sampling locations, arsenic concentrations, and other chemical  
66 characteristics of soil and groundwater samples used in this study.

67 **Table S2:** *ArrA* gene forward and reverse primers (black) along with sequencing  
68 adapter (blue) and unique identifier sequences (green).

69 **Table S3:** Distribution of the previously described *arrA* gene sequences from the  
70 GenBank among different major phylogenetic groups.

71 **Table S4:** Distribution of the previously described *arrA* gene sequences (9) from the  
72 Cache Valley Basin, Utah.

73

#### 74 **REFERENCES**

- 75 **1. Ying SC, Damashek J, Fendorf S, Francis CA.** 2015. Indigenous arsenic(V)-  
76 reducing microbial communities in redox-fluctuating near-surface sediments of  
77 the Mekong Delta. *Geobiol* **13**:581–587.
- 78 **2. Zhang SY, Zhao FJ, Sun GX, Su JQ, Yang XR, Li H, Zhu YG.** 2015. Diversity  
79 and Abundance of Arsenic Biotransformation Genes in Paddy Soils from  
80 Southern China. *Environ Sci Technol* **49**:4138-4146.
- 81 **3. Ohtsuka T, Yamaguchi N, Makino T, Sakurai K, Kimura K, Kudo K, Homma**  
82 **E, Dong DT, Amachi S.** 2013. Arsenic dissolution from Japanese paddy soil by  
83 a dissimilatory arsenate-reducing bacterium *Geobacter* sp. OR-1. *Environ Sci*  
84 *Technol* **47**:6263-6271.
- 85 **4. Mumford AC, Barringer JL, Benzel WM, Reilly PA, Young LY.** 2012.  
86 Microbial transformations of arsenic: mobilization from glauconitic sediments to  
87 water. *Water Res* **46**:2859–2868.
- 88 **5. Song B, Chyun E, Jaffé PR, Ward BB.** 2009. Molecular methods to detect and  
89 monitor dissimilatory arsenate-respiring bacteria (DARB) in sediments. *FEMS*  
90 *Microbiol Ecol* **68**:108–117.
- 91 **6. Upadhyaya G, Clancy TM, Brown J, Hayes KF, Raskin L.** 2012. Optimization  
92 of arsenic removal water treatment system through characterization of terminal  
93 electron accepting processes. *Environ Sci Technol* **46**:11702-11709.

- 94       **7. Héry M, Rizoulis A, Sanguin H, Cooke DA, Pancost RD, Polya DA, Lloyd**  
95       **JR.** 2015. Microbial ecology of arsenic-mobilizing Cambodian sediments:  
96       lithological controls uncovered by stable-isotope probing. *Enviro Microbiol*  
97       **17**:1857–1869.
- 98       **8. Héry M, YanDongen BE, Gill F, Mondal D, Vaughan DJ, Pancost RD, Polya**  
99       **DA, Lloyd JR.** 2010. Arsenic release and attenuation in low organic carbon  
100       aquifer sediments from West Bengal. *Geobiol* **8**:155-168.
- 101       **9. Mirza BS, Muruganandam S, Meng X, Sorensen DL, Dupont RR,**  
102       **McLean JE.** 2014. Arsenic(V) reduction in relation to Iron(III)  
103       transformation and molecular characterization of the structural and  
104       functional microbial community in sediments of a basin-fill aquifer in  
105       Northern Utah. *Appl Environ Microbiol* **80**:3198–3208.
- 106
- 107

Fig. S1

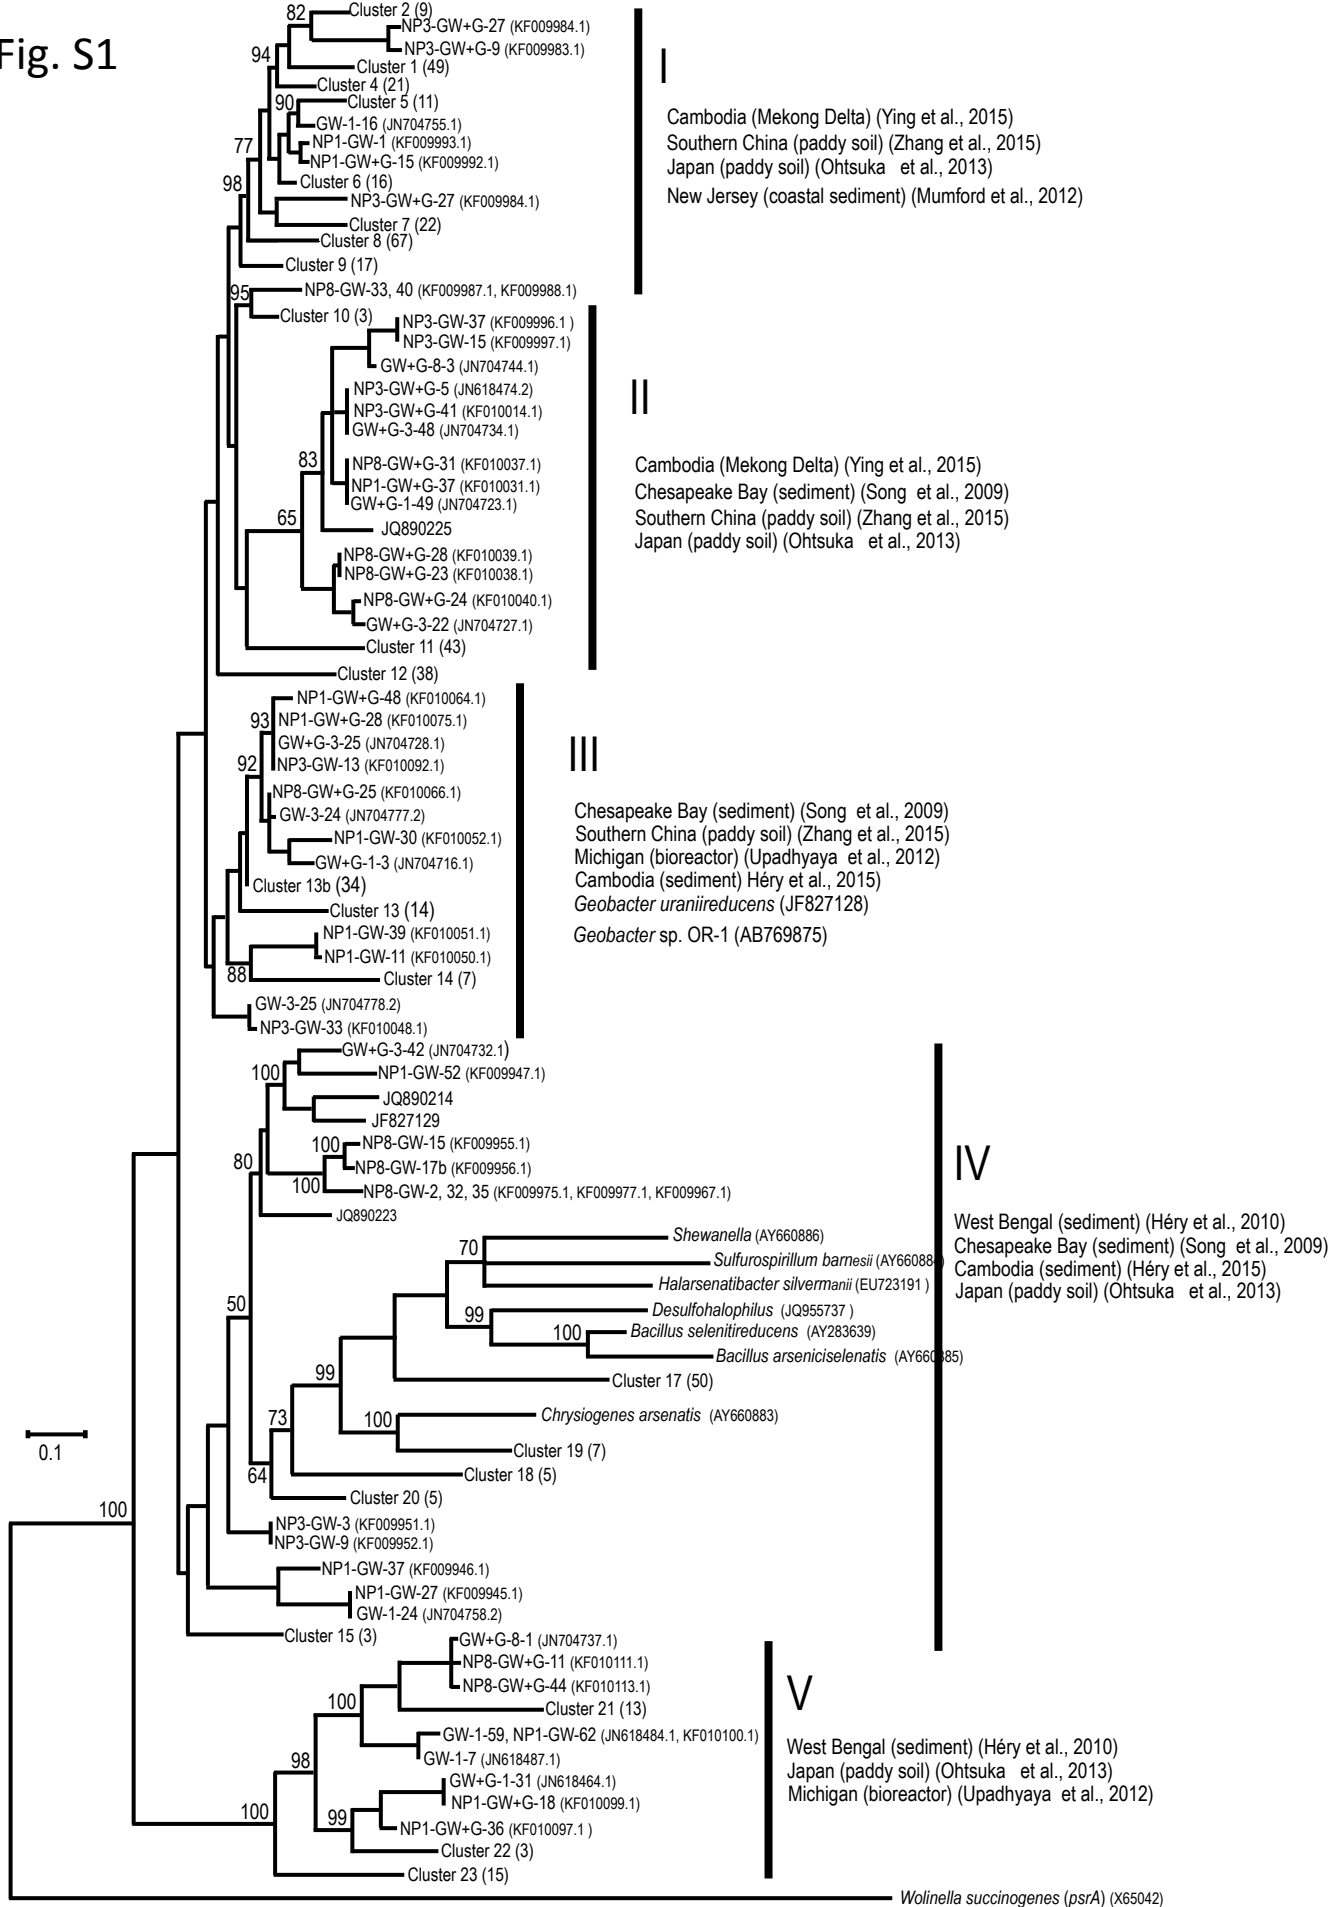

Fig. S2A

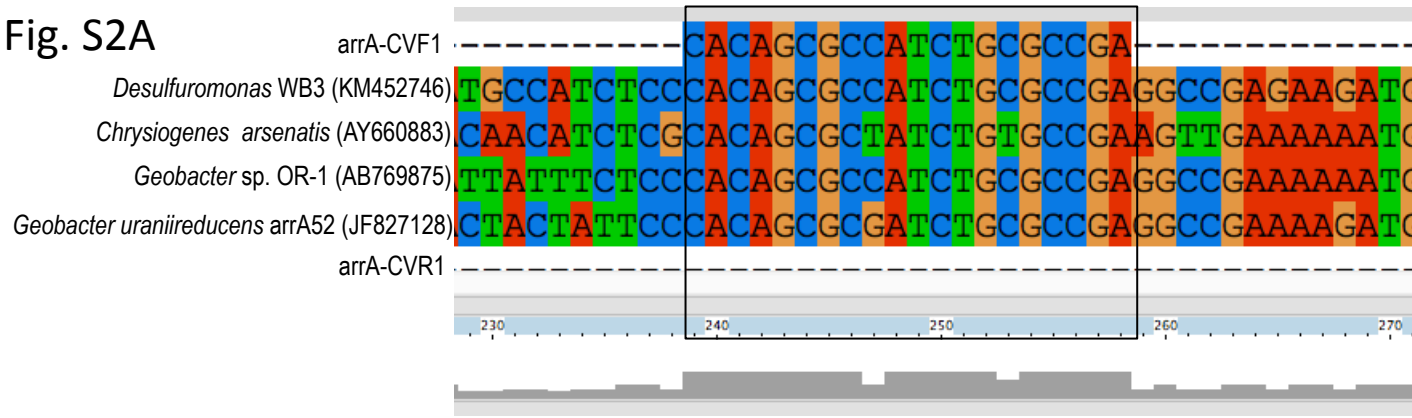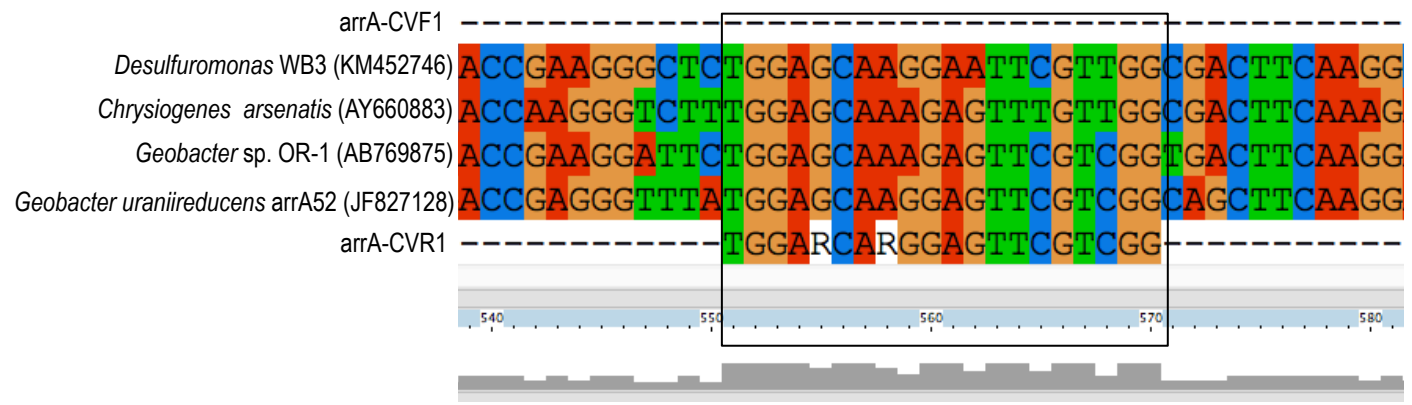

Fig. S2B

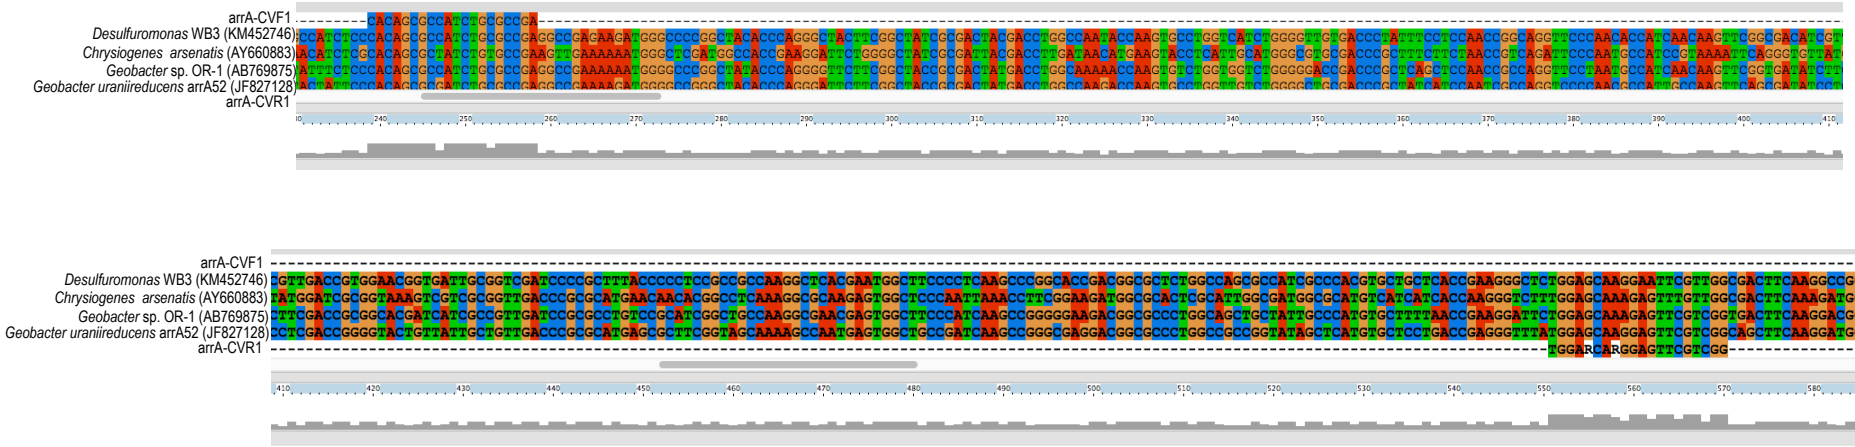

Fig. S3

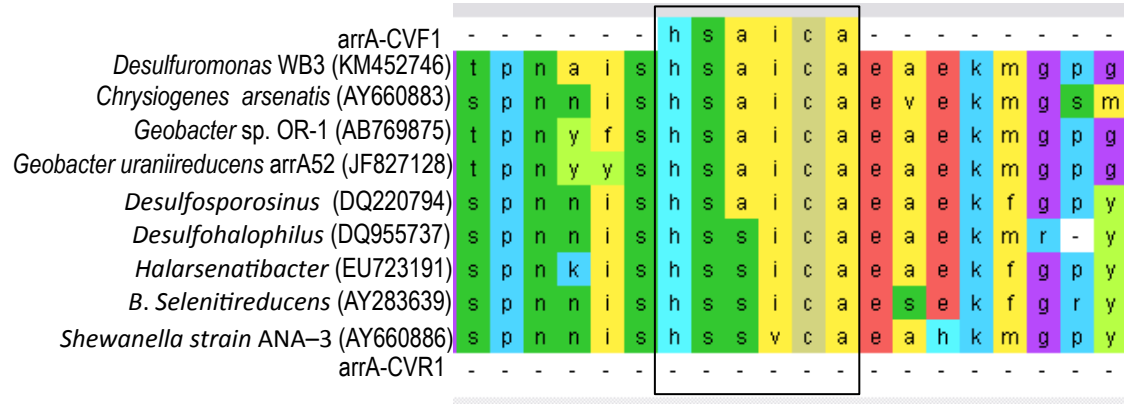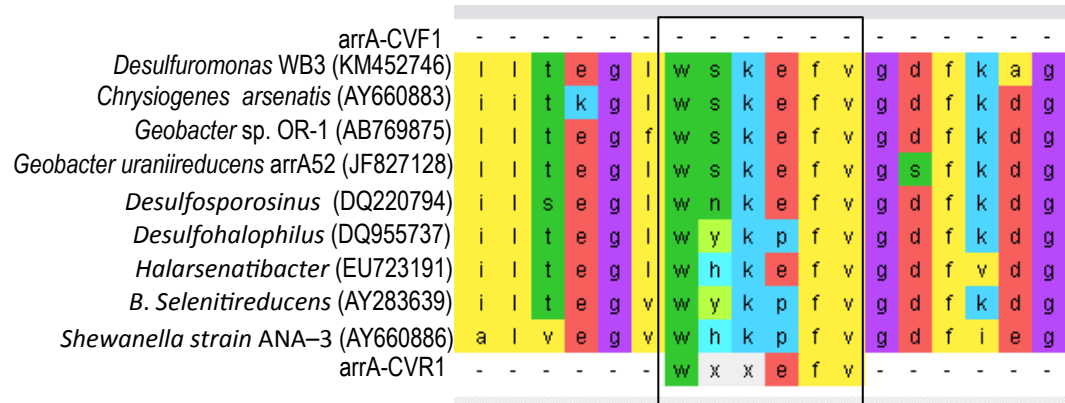

Fig. S4

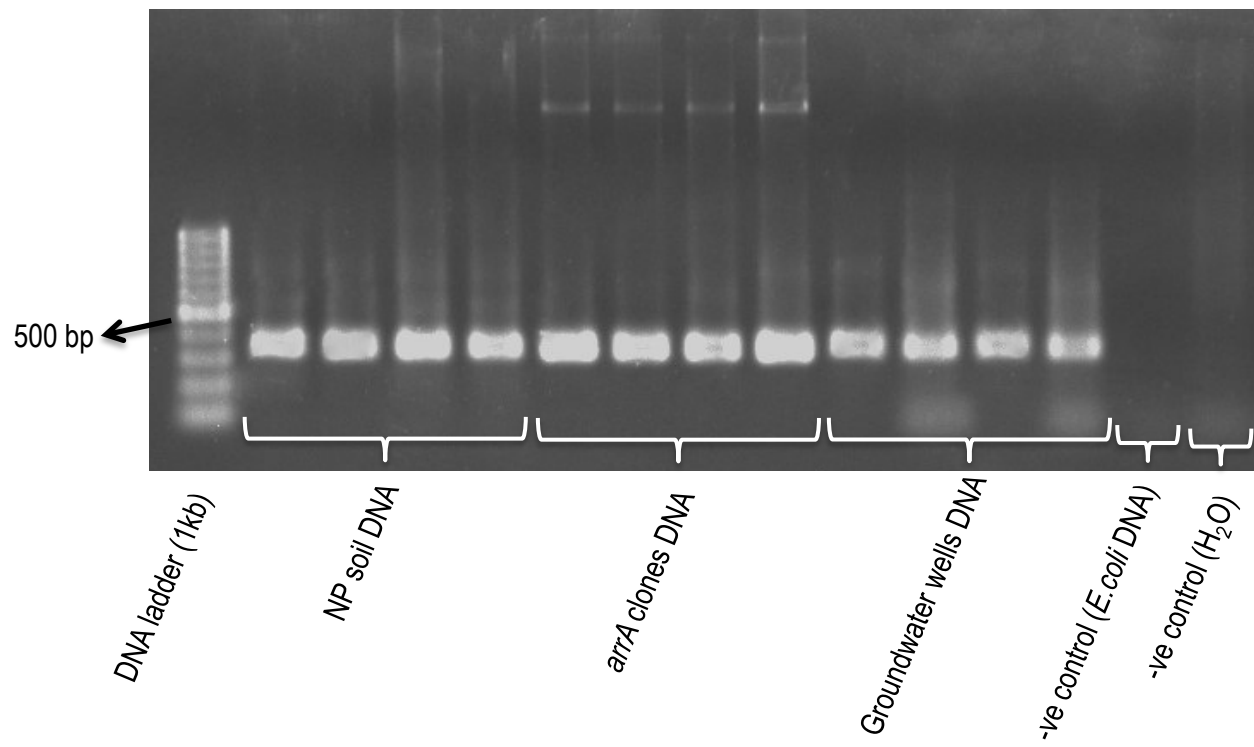



Fig. S5

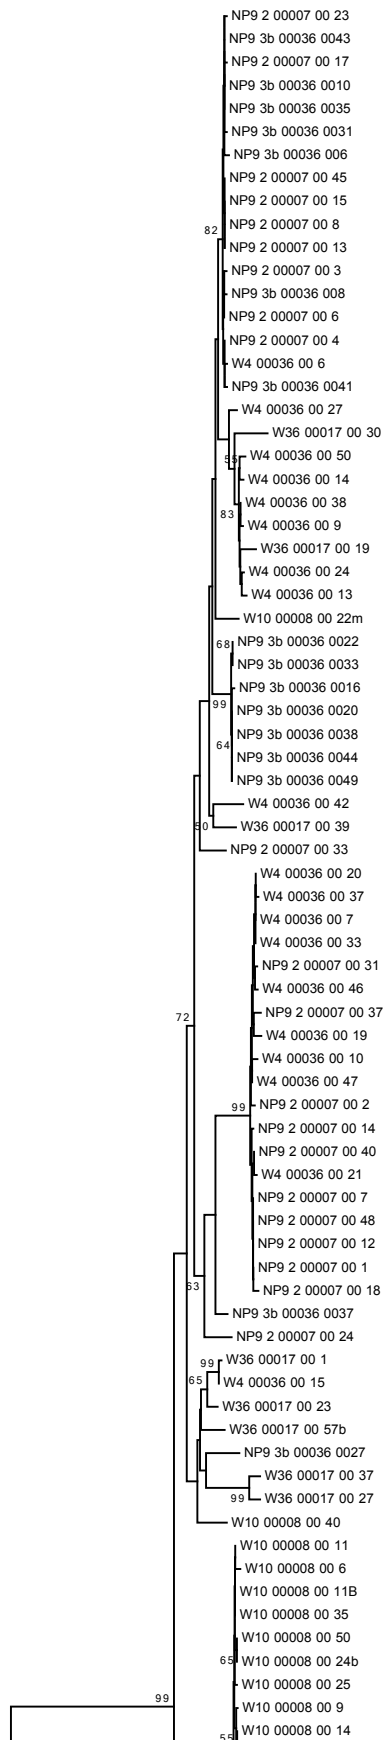

Continue Fig. S5

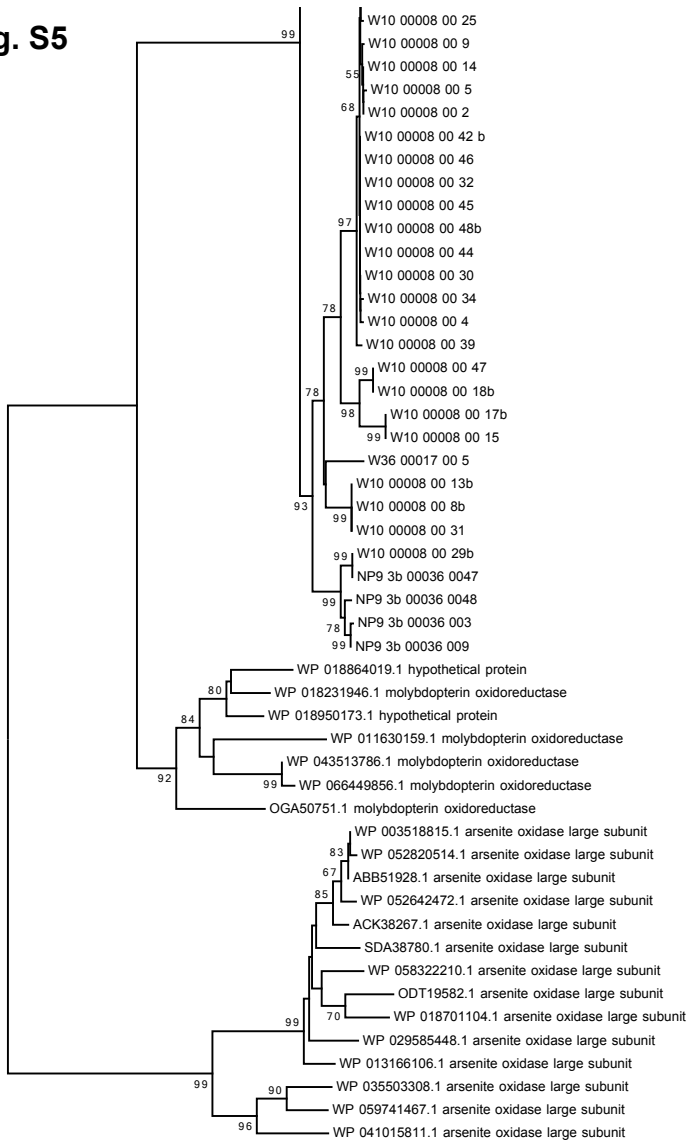

Fig. S6

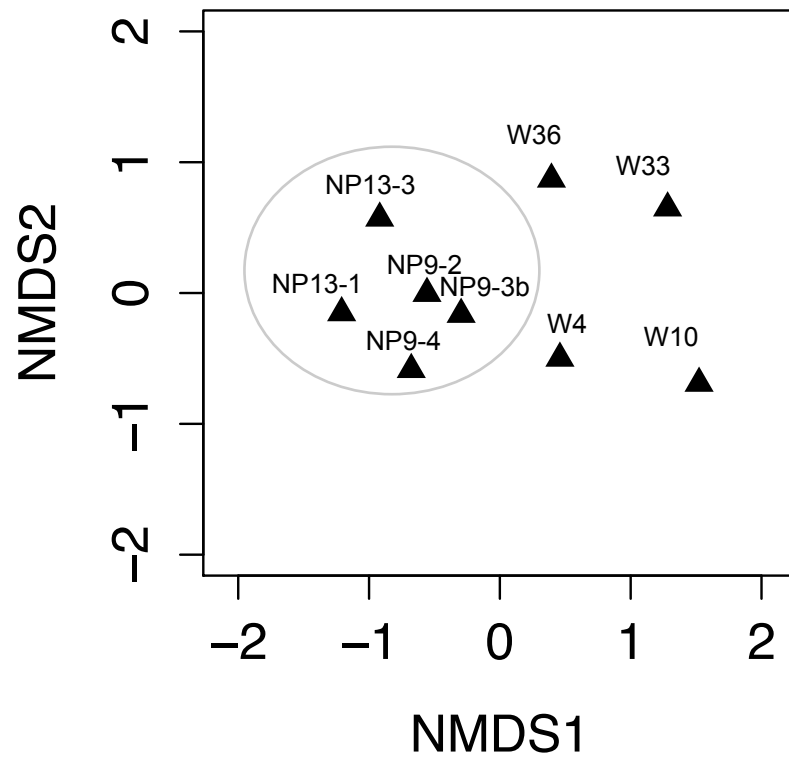

Fig. S7

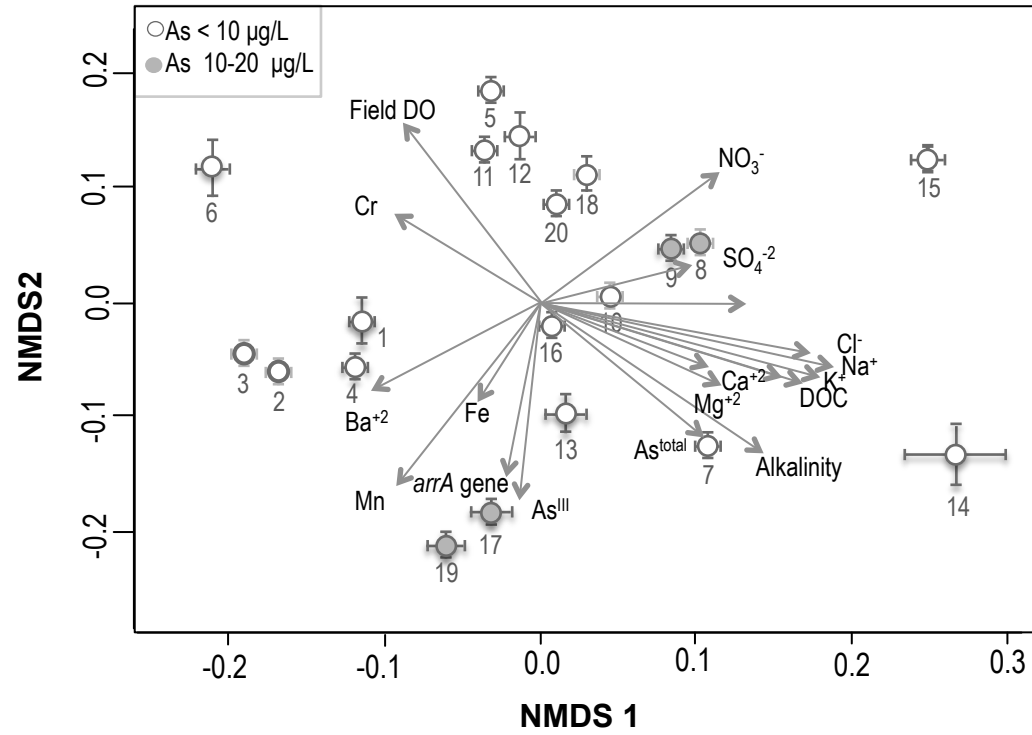

**Table S1: Sampling locations, arsenic concentrations, and other chemical characteristics of soil and groundwater samples used in this study (reported as mean values).**

| Wells number                   | Locations                  | Depth cm | As <sup>III</sup> in µg/L (µM) | *As <sup>total</sup> in µg/L (µM) | arrA gene (log) | DO mg/L | EC µS/cm | pH   | DOC mg/L | Alkalinity mg CaCO <sub>3</sub> /L | Cl mg/L | SO <sub>4</sub> <sup>2-</sup> (mg/L) | NO <sub>3</sub> -N (mg/L) | Na (mg/L) | Ca (mg/L) | Mg (mg/L) | K (mg/L) | Fe (mg/L) | Mn (µg/L) | Ba (µg/L) | Cr (µg/L) |
|--------------------------------|----------------------------|----------|--------------------------------|-----------------------------------|-----------------|---------|----------|------|----------|------------------------------------|---------|--------------------------------------|---------------------------|-----------|-----------|-----------|----------|-----------|-----------|-----------|-----------|
| 1                              | 41°40.081'N 111°54.602'W   | 220      | 0.7 (0.009)                    | 1.2 (0.016)                       | 3.5             | 6.5     | 509      | 7.01 | 0.9      | 309                                | 13.6    | 24.9                                 | 0.53                      | 18.0      | 68.6      | 32.4      | 6.7      | 0.66      | 478       | 358       | 2.2       |
| 2                              | 41°40.042'N 111°54.322'W   | 168      | 0.5 (0.007)                    | 0.7 (0.01)                        | 3.3             | 5.3     | 557      | 7.39 | 0.4      | 251                                | 10.4    | 62.6                                 | 0.01                      | 9.6       | 72.8      | 30.2      | 3.7      | 3.667     | 567       | 240       | 2.1       |
| 3                              | 41°40.183'N 111°54.483'W   | 160      | 0.4 (0.005)                    | 0.5 (0.01)                        | 3.4             | 2.8     | 573      | 7.31 | 0.3      | 245                                | 10.1    | 58.7                                 | 0.01                      | 8.4       | 72.8      | 28.8      | 2.5      | 4.30      | 354       | 190       | 3.7       |
| 4                              | 41°40.182'N 111°54.840'W   | 200      | 1.9 (0.025)                    | 2.5 (0.03)                        | 4.7             | 6.2     | 610      | 7.16 | 0.4      | 323                                | 17.1    | 3.8                                  | 0.02                      | 19.5      | 69.8      | 31.2      | 5.9      | 1.95      | 357       | 225       | 1.9       |
| 5                              | 41°41.814'N 111°58.660'W   | 237      | 0.1 (0.001)                    | 1.0 (0.01)                        | 3.5             | 7.5     | 420      | 7.10 | 0.4      | 222                                | 20.2    | 6.4                                  | 2.06                      | 20.4      | 74.1      | 8.6       | 1.9      | 0.04      | 2.6       | 84        | 2.1       |
| 6                              | 41°41.572'N 111°48.969'W   | 450      | 0.1 (0.001)                    | 1.9 (0.03)                        | 4.2             | 8.2     | 417      | 7.18 | 1.1      | 178                                | 19.3    | 2.5                                  | 0.57                      | 9.5       | 60.9      | 7.7       | 1.1      | 9.95      | 112       | 58        | 10.8      |
| 7                              | 41°44.939'N 111°57.804'W   | 245      | 5.4 (0.072)                    | 6.4 (0.09)                        | 5.4             | 5.7     | 916      | 7.31 | 2.7      | 430                                | 41.8    | 0.9                                  | 0.02                      | 137       | 33.2      | 20.0      | 7.2      | 0.79      | 87        | 139       | 1.7       |
| 8                              | 41°46.108'N 111°59.040'W   | 92       | 0.1 (0.001)                    | 12 (0.16)                         | 4.0             | 6.2     | 815      | 7.11 | 1.4      | 310                                | 64.4    | 66.0                                 | 2.39                      | 57.7      | 83.3      | 34.2      | 8.9      | 0.56      | 4.6       | 87        | 2.3       |
| 9                              | 41°46.141'N 111°59.305'W   | 150      | 0.1 (0.001)                    | 10.9 (0.15)                       | 3.8             | 5.6     | 804      | 7.18 | 1.1      | 288                                | 57.3    | 69.0                                 | 2.14                      | 66.1      | 74.6      | 28.3      | 8.9      | 0.12      | 2.6       | 44        | 2.2       |
| 10                             | 41.76946 N -112.00803 W    | 298      | 0.7 (0.009)                    | 9.4 (0.13)                        | 4.8             | 3.9     | 694      | 7.23 | 1.2      | 247                                | 48.7    | 50.2                                 | 0.25                      | 34.8      | 75.6      | 27.0      | 5.8      | 0.34      | 28.8      | 118       | 1.9       |
| 11                             | 41°48.406'N 111°52.020'W   | 292      | 0.1 (0.001)                    | 4.1 (0.05)                        | 4.3             | 6.4     | 727      | 7.25 | 0.3      | 191                                | 15.5    | 5.6                                  | 0.18                      | 24.8      | 34.8      | 18.2      | 2.0      | 0.028     | 0.8       | 115       | 2.4       |
| 12                             | 41°49.065'N 111°51.177'W   | 200      | 0.1 (0.001)                    | 1.1 (0.01)                        | 3.1             | 7.9     | 570      | 7.07 | 0.8      | 236                                | 9.7     | 9.8                                  | 4.08                      | 18.9      | 52.3      | 24.7      | 4.5      | 0.020     | 0.3       | 104       | 3.2       |
| 13                             | 41°47.716'N 111°52.890'W   | 150      | 3.3 (0.044)                    | 4.2 (0.06)                        | 4.8             | 4.3     | 457      | 7.51 | 1.4      | 220                                | 8.5     | 0.3                                  | 0.06                      | 31.7      | 40.5      | 14.8      | 1.5      | 2.42      | 51.7      | 75        | 1.9       |
| 14                             | 41°56.021'N 112°02.710'W   | 100      | 1.0 (0.013)                    | 8.2 (0.11)                        | 3.4             | 2.5     | 1585     | 7.27 | 3.3      | 519                                | 187     | 29.3                                 | 0.02                      | 172       | 62.0      | 46.3      | 20.0     | 9.66      | 206       | 116       | 3.1       |
| 15                             | 41°57.082'N 111°58.441'W   |          | 0.2 (0.003)                    | 7.9 (0.11)                        | 3.2             | 5.3     | 686      | 7.12 | 2.3      | 294                                | 51.9    | 146                                  | 13.76                     | 82.7      | 82.4      | 40.1      | 11.5     | 0.30      | 0.6       | 37        | 2.1       |
| 16                             | 41°54.959' N 112° 3.605' W | 183      | 1.6 (0.021)                    | 8.7 (0.12)                        | 5.0             | 4.2     | 586      | 7.12 | 0.8      | 306                                | 15.6    | 51.4                                 | 0.22                      | 15.9      | 90.3      | 22.9      | 3.3      | 1.02      | 57.7      | 32        | 1.6       |
| 17                             | 41°55.042'N 112°3.626'W    | 150      | 12.6 (0.168)                   | 15.5 (0.21)                       | 5.3             | 7.0     | 618      | 7.02 | 0.6      | 281                                | 13.1    | 16.3                                 | 0.18                      | 9.6       | 77.3      | 20.3      | 5.8      | 5.13      | 171       | 42        | 2.0       |
| 18                             | 41°54.267'N 112°2.718'W    | 140      | 0.10 (0.001)                   | 6.9 (0.09)                        | 4.3             | 3.1     | 645      | 7.20 | 0.6      | 249                                | 21.8    | 23.5                                 | 1.87                      | 15.5      | 93.4      | 11.9      | 5.3      | 0.024     | 0.4       | 85        | 2.2       |
| 19                             | 41°54.187'N 112°3.062'W    | 57       | 15.6 (0.208)                   | 18.2 (0.24)                       | 5.7             | 3.1     | 645      | 7.20 | 0.9      | 275                                | 22.7    | 29.0                                 | 0.09                      | 21.0      | 86.4      | 16.5      | 6.4      | 1.05      | 1109      | 158       | 1.9       |
| 20                             | 41°54.325'N 112°2.595'W    | 130      | 0.2 (0.003)                    | 6.6 (0.09)                        | 3.0             | 0.6     | 4120     | 7.20 | 0.8      | 265                                | 23.4    | 20.7                                 | 0.49                      | 14.5      | 93.1      | 13.1      | 5.5      | 0.045     | 2.6       | 87        | 2.9       |
| 33                             | 41°44.044'N 111°52.778' W  | 6.8      | 50.5 (0.674)                   | 87.1 (1.16)                       | 8.2             | 0.6     | 3840     | 6.81 | 44.9     | 1265                               | 706     | 4.9                                  | 0.35                      | 354       | 178       | 181       | 39.2     | 5.30      | 1340      | 914       | 1.6       |
| 34                             | 41°43.838'N -111°52.792'W  | 8        | 16.9 (0.226)                   | 23.6 (0.31)                       | 6.6             | 0.2     | 8230     | 6.95 | 28.2     | 895                                | 631     | 21.7                                 | 0.02                      | 440       | 105       | 147       | 46.3     | 1.24      | 1179      | 457       | 0.7       |
| 35                             | 41°43.755'N -111° 52.790'W | 6.6      | 30.0 (0.40)                    | 20.7 (0.28)                       | 6.6             | 0.6     | 3330     | 7.40 | 4.0      | 451                                | 130     | 5.8                                  | 0.78                      | 87.3      | 54.4      | 59.4      | 11.8     | 0.069     | 8         | 170       | 0.3       |
| 36                             | 41°44.028'N 111°52.445' W  | 4.2      | 1.3 (0.017)                    | 85.2 (1.14)                       | 6.0             | 6.5     | 509      | 7.84 | 10       | 1005                               | 424     | 155                                  | 0.10                      | 591       | 19.4      | 67.1      | 27.0     | 0.039     | 40        | 160       |           |
| <b>Soil pore water samples</b> |                            |          |                                |                                   |                 |         |          |      |          |                                    |         |                                      |                           |           |           |           |          |           |           |           |           |
| NP9-2                          | 41°44.074'N                |          |                                |                                   |                 | ND      |          |      |          |                                    |         |                                      |                           |           | 17.0      |           |          |           |           |           |           |
|                                | 111°52.3707'W              | 38       | 4.71                           | 10.5 (0.14)                       | ND**            |         | 315      | 7.71 | 13.7     | 119                                | 108     | 92.2                                 | 1.9                       | 124       |           | 10.9      | 4.26     | 0.012     | 2.77      | 325       | ND        |
| NP9-3                          | 41°44.074'N                |          |                                |                                   |                 | ND      |          |      |          |                                    |         |                                      |                           |           | 7.7       |           |          |           |           |           |           |
|                                | 111°52.3707'W              | 63       | 5.60                           | 23.2 (0.31)                       | ND              |         | 331      | 7.89 | 17.3     | 151                                | 96.0    | 74.1                                 | 0.08                      | 135       |           | 7.0       | 5.56     | 0.04      | 1.87      | 196       | ND        |
| NP9-4                          | 41°44.074'N                |          |                                |                                   |                 | ND      |          |      |          |                                    |         |                                      |                           |           | 5.04      |           |          |           |           |           |           |
|                                | 111°52.3707'W              | 93       | 45.4                           | 158. (2.11)                       | ND              |         | 290      | 8.02 | 6.41     | 198                                | 57.4    | 72.4                                 | 0.14                      | 134       |           | 4.81      | 6.90     | 0.02      | 2.1       | 145       | ND        |
| NP13-1                         | 41°43.992'N 111°52.032'W   | 11       | 1.21                           | 17.2 (0.23)                       | ND              | ND      | 783      | 7.96 | 15.8     | 394                                | 146     | 250                                  | 0.06                      | 323       | 10.1      | 4.10      | 4.11     | 0.58      | 32.9      | 85.0      | ND        |
| NP13-3                         | 41°43.992'N 111°52.032'W   | 62       | 32.0                           | 118. (1.57)                       | ND              | ND      | 661      | 8.46 | 11.4     | 230                                | 170     | 106                                  | 0.17                      | 214       | 5.35      | 18.3      | 11.3     | 0.07      | 1.64      | 268       | ND        |

DO (dissolved oxygen), EC (electrical conductivity), DOC (dissolved organic carbon)

\*For soils: concentration is in a water extraction of the soil (soil pore water)

\*\*not determined

**Table S2. *ArrA* gene forward and reverse primers (black) along with sequencing adapter (blue) and unique identifier sequences (green).**

| Primer number  | <i>ArrA</i> gene primer sequences along with the 454 sequencing adaptor and unique identifiers |
|----------------|------------------------------------------------------------------------------------------------|
| arrA-CVF1 (1)  | CCATCTCATCCCTGCGTGTCTCCGACTCAG ACATGACGAC CACAGCGCCATCTGCGCCGA                                 |
| arrA-CVF1 (2)  | CCATCTCATCCCTGCGTGTCTCCGACTCAG ACGACAGCTC CACAGCGCCATCTGCGCCGA                                 |
| arrA-CVF1 (3)  | CCATCTCATCCCTGCGTGTCTCCGACTCAG ACGTCTCATC CACAGCGCCATCTGCGCCGA                                 |
| arrA-CVF1 (4)  | CCATCTCATCCCTGCGTGTCTCCGACTCAG ACTCATCTAC CACAGCGCCATCTGCGCCGA                                 |
| arrA-CVF1 (5)  | CCATCTCATCCCTGCGTGTCTCCGACTCAG ACTCGCGCAC CACAGCGCCATCTGCGCCGA                                 |
| arrA-CVF1 (6)  | CCATCTCATCCCTGCGTGTCTCCGACTCAGAGAGCGTAC CACAGCGCCATCTGCGCCGA                                   |
| arrA-CVF1 (7)  | CCATCTCATCCCTGCGTGTCTCCGACTCAG AGCGACTAGC CACAGCGCCATCTGCGCCGA                                 |
| arrA-CVF1 (8)  | CCATCTCATCCCTGCGTGTCTCCGACTCAG AGTAGTGATC CACAGCGCCATCTGCGCCGA                                 |
| arrA-CVF1 (9)  | CCATCTCATCCCTGCGTGTCTCCGACTCAG AGTGACACAC CACAGCGCCATCTGCGCCGA                                 |
| arrA-CVF1 (10) | CCATCTCATCCCTGCGTGTCTCCGACTCAG AGTGTATGTC CACAGCGCCATCTGCGCCGA                                 |
| arrA-CVF1 (11) | CCATCTCATCCCTGCGTGTCTCCGACTCAG ATAGATAGAC CACAGCGCCATCTGCGCCGA                                 |
| arrA-CVF1 (12) | CCATCTCATCCCTGCGTGTCTCCGACTCAG ATATAGTCGC CACAGCGCCATCTGCGCCGA                                 |
| arrA-CVF1 (13) | CCATCTCATCCCTGCGTGTCTCCGACTCAG ATCTACTGAC CACAGCGCCATCTGCGCCGA                                 |
| arrA-CVF1 (14) | CCATCTCATCCCTGCGTGTCTCCGACTCAG CACGTAGATC CACAGCGCCATCTGCGCCGA                                 |
| arrA-CVF1 (15) | CCATCTCATCCCTGCGTGTCTCCGACTCAG CACGTGTCGC CACAGCGCCATCTGCGCCGA                                 |
| arrA-CVF1 (16) | CCATCTCATCCCTGCGTGTCTCCGACTCAG CATACTCTAC CACAGCGCCATCTGCGCCGA                                 |
| arrA-CVF1 (17) | CCATCTCATCCCTGCGTGTCTCCGACTCAG CGACACTATC CACAGCGCCATCTGCGCCGA                                 |
| arrA-CVF1 (18) | CCATCTCATCCCTGCGTGTCTCCGACTCAG CGAGACGCGC CACAGCGCCATCTGCGCCGA                                 |
| arrA-CVF1 (19) | CCATCTCATCCCTGCGTGTCTCCGACTCAG CGTATGCGAC CACAGCGCCATCTGCGCCGA                                 |
| arrA-CVF1 (20) | CCATCTCATCCCTGCGTGTCTCCGACTCAG CGTCGATCTC CACAGCGCCATCTGCGCCGA                                 |
| arrA-CVF1 (21) | CCATCTCATCCCTGCGTGTCTCCGACTCAG CTACGACTGC CACAGCGCCATCTGCGCCGA                                 |
| arrA-CVF1 (22) | CCATCTCATCCCTGCGTGTCTCCGACTCAG CTAGTCACTC CACAGCGCCATCTGCGCCGA                                 |
| arrA-CVF1 (23) | CCATCTCATCCCTGCGTGTCTCCGACTCAG CTCTACGCTC CACAGCGCCATCTGCGCCGA                                 |
| arrA-CVF1 (24) | CCATCTCATCCCTGCGTGTCTCCGACTCAG CTGTACATAC CACAGCGCCATCTGCGCCGA                                 |
| arrA-CVF1 (25) | CCATCTCATCCCTGCGTGTCTCCGACTCAG ACTAGCAGTA CACAGCGCCATCTGCGCCGA                                 |
| arrA-CVR1      | CCTCTCTATGGGCAGTCGGTGATCCGACGAACTCCYTGYTCCA                                                    |

**Table S3.** Distribution of the previously described *arrA* gene sequences from the GenBank among different major phylogenetic groups.

| Cluster            | Accession No.                                                                                                                                                                                                                                                                                                                                                                                                                                                                                                                                                                                                                                                                                                                                                                                                                                                                                                                                                                                                                                                                                                                                                                                                                                                                                                                                                                                                                                                                                                                         | Identity (%)          | Location                      | Reference |
|--------------------|---------------------------------------------------------------------------------------------------------------------------------------------------------------------------------------------------------------------------------------------------------------------------------------------------------------------------------------------------------------------------------------------------------------------------------------------------------------------------------------------------------------------------------------------------------------------------------------------------------------------------------------------------------------------------------------------------------------------------------------------------------------------------------------------------------------------------------------------------------------------------------------------------------------------------------------------------------------------------------------------------------------------------------------------------------------------------------------------------------------------------------------------------------------------------------------------------------------------------------------------------------------------------------------------------------------------------------------------------------------------------------------------------------------------------------------------------------------------------------------------------------------------------------------|-----------------------|-------------------------------|-----------|
| <b>Cluster I</b>   | [KR045408, KR045509, KR045417, KR045413, KR045511, KR045421, KR045434, KR045439, KR045437, KR045436, KR045451, KR045432, KR045337, KR045336, KR045396, KR045369, KR045400, KR045406, KR045429, KR045403, KR045405, KR045582, KR045583, KR045521, KR045530, KR045520, KR045418, KR045398, KR045409, KR045420, KR045341, KR045415, KR045412, KR045483, KR045488, KR045502, KR045411, KR045539, KR045534, KR045550, KR045537, KR045515, KR045541, KR045535, KR045312, KR045324, KR045328, KR045318, KR045315, KR04532, KR04532, KR04532, KR045342, KR045331, KR045333, KR045330, KR045404, KR045366, KR045329, KR045419, KR045357, KR045362, KR045345, KR045339, KR045338, KR045372, KR045358, KR045343, KR045410, KR045340, KR045361, KR045367, KR045360, KR045371, KR045359, KR045497, KR045365, KR045416, KR045399, KR045466, KR045498, KR045508, KR045510, KR045514, KR045499, KR045505, KR045540, KR045496, KR045491, KR045478, KR045487, KR045543, KR045489, KR045552, KR045571, KR045518, KR045352, KR045349, KR045492, KR045486, KR045581, KR045522, KR045479, KR045490, KR045559, KR045474, KR045493, KR045531, KR045528, KR045525, KR045458, KR045313, KR045558, KR045568, KR045484, KR045378, KR045517, KR045310, KR045472, KR045501, KR045495, KR045482, KR045580, KR045480, KR045481, KR045565, KR045555, KR045578, KR045579, KR045373, KR045453, KR045468, KR045523, KR045586, KR045566, KR045572, KR045532, KR045473, KR045575, KR045527, KR045475, KR045566, KR045519, KR045467, KR045533, KR045476, KR045463, KR045455] | 85-100%               | Cambodia (Mekong Delta)       | (1)       |
|                    | KP061061, KP061059, KP061060, KP06107, KP061101, KP061051, KP061138, KP061102, KP061107, KP061039, KP061093, KP061108, KP061089, KP061038, KP061063, KP061064, KP061084, KP061042, KP061070, KP061065, KP061131, KP061053, KP061054, KP061040, KP061097, KP061069, KP061041, KP061114, KP061047, KP061050, KP061048, KP061118, KP061115, KP061117, KP061132, KP061139, KP061126, KP061112, KP061116, KP060963, KP060964, KP060966, KP061035, KP060972, KP060988, KP061001, KP060998, KP061057, KP061134, KP061056, KP061023, KP060974, KP061146, KP061128, KP060975]                                                                                                                                                                                                                                                                                                                                                                                                                                                                                                                                                                                                                                                                                                                                                                                                                                                                                                                                                                  |                       | Southern China (paddy soil)   | (2)       |
|                    | AB769399, AB769384, AB769388, AB769393, AB769395, AB769389                                                                                                                                                                                                                                                                                                                                                                                                                                                                                                                                                                                                                                                                                                                                                                                                                                                                                                                                                                                                                                                                                                                                                                                                                                                                                                                                                                                                                                                                            |                       | Japan (paddy soil)            | (3)       |
|                    | JQ041518, JQ0415221, JQ0415222, JQ041520                                                                                                                                                                                                                                                                                                                                                                                                                                                                                                                                                                                                                                                                                                                                                                                                                                                                                                                                                                                                                                                                                                                                                                                                                                                                                                                                                                                                                                                                                              |                       | New Jersey (coastal sediment) | (4)       |
|                    |                                                                                                                                                                                                                                                                                                                                                                                                                                                                                                                                                                                                                                                                                                                                                                                                                                                                                                                                                                                                                                                                                                                                                                                                                                                                                                                                                                                                                                                                                                                                       |                       |                               |           |
| <b>Cluster II</b>  | [KR045447, KR045423, KR045424, KR045426, KR045422, KR045562, KR045569, KR045563, KR045553, KR045560, KR045554, KR045561, KR045379, KR045459, KR045449, KR045375, KR045444, KR045377, KR045391, KR045441, KR045382, KR045464, KR045384, KR045381, KR045394, KR045386, KR045443, KR045374, KR045393, KR045456, KR045452, KR045392, KR045454, KR045442, KR045460, KR045389, KR045356, KR045354]                                                                                                                                                                                                                                                                                                                                                                                                                                                                                                                                                                                                                                                                                                                                                                                                                                                                                                                                                                                                                                                                                                                                          | 85-100%               | Cambodia (Mekong Delta)       | (1)       |
|                    | [FJ747534, FJ747544, FJ747540, FJ747543, FJ747541, FJ747546, FJ747537, FJ747539, FJ747547, FJ747546, FJ747536, FJ747531, FJ747533, FJ747554, FJ747559, FJ747560, FJ747549, FJ747558, FJ747555, FJ747548, FJ747535, FJ747538]                                                                                                                                                                                                                                                                                                                                                                                                                                                                                                                                                                                                                                                                                                                                                                                                                                                                                                                                                                                                                                                                                                                                                                                                                                                                                                          |                       | Chesapeake Bay (sediment)     | (5)       |
|                    | [KP061110, KP061046, KP061140, KP061004, KP061149, KP061150, KP061133, KP061034, KP060994, KP061000, KP060971, KP061121, KP061127, KP061120, KP061123, KP061129, KP061125, KP061119, KP061122]                                                                                                                                                                                                                                                                                                                                                                                                                                                                                                                                                                                                                                                                                                                                                                                                                                                                                                                                                                                                                                                                                                                                                                                                                                                                                                                                        |                       | Southern China (paddy soil)   | (2)       |
|                    | [AB769396, AB769397]                                                                                                                                                                                                                                                                                                                                                                                                                                                                                                                                                                                                                                                                                                                                                                                                                                                                                                                                                                                                                                                                                                                                                                                                                                                                                                                                                                                                                                                                                                                  |                       | Japan (paddy soil)            | (3)       |
|                    |                                                                                                                                                                                                                                                                                                                                                                                                                                                                                                                                                                                                                                                                                                                                                                                                                                                                                                                                                                                                                                                                                                                                                                                                                                                                                                                                                                                                                                                                                                                                       |                       |                               |           |
| <b>Cluster III</b> | <b><i>Geobacter uraniireducens</i> arrA52 (JF827128), <i>Geobacter</i> sp. OR-1 (AB769875)</b>                                                                                                                                                                                                                                                                                                                                                                                                                                                                                                                                                                                                                                                                                                                                                                                                                                                                                                                                                                                                                                                                                                                                                                                                                                                                                                                                                                                                                                        | 85-100%               | Southern China (paddy soil)   | (2)       |
|                    | [KP061052, KP061055, KP061049, KP061076, KP061014, KP061075, KP061092, KP061091, KP061018, KP061095, KP061099, KP061073, KP061100]                                                                                                                                                                                                                                                                                                                                                                                                                                                                                                                                                                                                                                                                                                                                                                                                                                                                                                                                                                                                                                                                                                                                                                                                                                                                                                                                                                                                    |                       | Chesapeake Bay (sediment)     | (5)       |
|                    | [FJ747538, FJ747535, FJ747548]                                                                                                                                                                                                                                                                                                                                                                                                                                                                                                                                                                                                                                                                                                                                                                                                                                                                                                                                                                                                                                                                                                                                                                                                                                                                                                                                                                                                                                                                                                        |                       | Michigan (bioreactor)         | (6)       |
|                    | [JF827135, JF827132, JF827107, JF827134, JF827122, JF827124, F827126, JF827101, JF827105, JF827136, JF827144, JF827103, JF827114, JF827142, JF827143, JF827104, JF827119, JF827145, JF827110, JF827146, JF827138, JF827109, JF827137, JF827127, JF827098, JF827099, JF827128, JF827125, JF827139, JF827141, JF827115, JF827131, JF827100, JF827148, JF827121, JF827129]                                                                                                                                                                                                                                                                                                                                                                                                                                                                                                                                                                                                                                                                                                                                                                                                                                                                                                                                                                                                                                                                                                                                                               |                       | Cambodia (sediment)           | (7)       |
|                    | [JQ890224, JQ89022a, JQ89022b, JQ890225]                                                                                                                                                                                                                                                                                                                                                                                                                                                                                                                                                                                                                                                                                                                                                                                                                                                                                                                                                                                                                                                                                                                                                                                                                                                                                                                                                                                                                                                                                              |                       |                               |           |
| <b>Cluster IV</b>  | <b><i>Bacillus selenitireducens</i> (AY283639), <i>Bacillus arseniciselenatis</i> (AY660885), <i>Sulfurospirillum barnesii</i> (AY660884), <i>Shewanella</i> (AY660886), <i>Chrysiogenes arsenatis</i> (AY660883), <i>Halarsenatibacter silvermanii</i> (EU723191), <i>Desulfosporosinus</i> (DQ220794),</b>                                                                                                                                                                                                                                                                                                                                                                                                                                                                                                                                                                                                                                                                                                                                                                                                                                                                                                                                                                                                                                                                                                                                                                                                                          | 85-100%               | West Bengal (sediment)        | (8)       |
|                    | [FN391000, FN390985, FN391002, FN390991, FN390987, FN390972, FN390998, FN390968, FN390981, FN390973, FN390974, FN390970, FN390992, FN390993, FN390997, FN390969, FN390978, FN390979, FN390958, FN390961, FN390977, FN390955, FN390990, FN390954, FN390983, FN390980, FN390986, FN391003, FN390966, FN390975, FN390984, FN390959, FN390982, FN391005, FN390963, FN390976, FN390962, FN391004, FN390996, FN390994]                                                                                                                                                                                                                                                                                                                                                                                                                                                                                                                                                                                                                                                                                                                                                                                                                                                                                                                                                                                                                                                                                                                      |                       | Chesapeake Bay (sediment)     | (5)       |
|                    | [FJ747600, FJ747598, FJ747602, FJ747589, FJ747594, FJ747595, FJ747586.]                                                                                                                                                                                                                                                                                                                                                                                                                                                                                                                                                                                                                                                                                                                                                                                                                                                                                                                                                                                                                                                                                                                                                                                                                                                                                                                                                                                                                                                               |                       | Cambodia (sediment)           | (7)       |
|                    | [JQ890215, JQ890214, JQ890216, JQ890217, JQ890209, JQ890212, JQ890211, JQ890210, JQ890213, JQ890218, JQ890220, JQ890219, JQ890223]                                                                                                                                                                                                                                                                                                                                                                                                                                                                                                                                                                                                                                                                                                                                                                                                                                                                                                                                                                                                                                                                                                                                                                                                                                                                                                                                                                                                    |                       | Japan (paddy soil)            | (3)       |
|                    | [AB769394, AB769386, AB769385, AB769390, AB769400]                                                                                                                                                                                                                                                                                                                                                                                                                                                                                                                                                                                                                                                                                                                                                                                                                                                                                                                                                                                                                                                                                                                                                                                                                                                                                                                                                                                                                                                                                    |                       |                               |           |
| <b>Cluster V</b>   | [JF827113, JF827111, JF827147, JF827130, JF827102, JF827140, JF827117, JF827108, JF827120, JF827123, JF827106, JF827118, JF827133.]                                                                                                                                                                                                                                                                                                                                                                                                                                                                                                                                                                                                                                                                                                                                                                                                                                                                                                                                                                                                                                                                                                                                                                                                                                                                                                                                                                                                   | 85-100%               | Michigan (bioreactor)         | (6)       |
|                    | [KR045570, KR045573, KR045585, KR045576, KR045584, KR045401, KR045397, KR045512, KR045513, KR045507, KR045504]                                                                                                                                                                                                                                                                                                                                                                                                                                                                                                                                                                                                                                                                                                                                                                                                                                                                                                                                                                                                                                                                                                                                                                                                                                                                                                                                                                                                                        |                       |                               |           |
|                    | [AB769387, AB769391, AB769392]                                                                                                                                                                                                                                                                                                                                                                                                                                                                                                                                                                                                                                                                                                                                                                                                                                                                                                                                                                                                                                                                                                                                                                                                                                                                                                                                                                                                                                                                                                        |                       | Cambodia (Mekong Delta)       | (1)       |
|                    | JQ041517, JQ041526, JQ041519                                                                                                                                                                                                                                                                                                                                                                                                                                                                                                                                                                                                                                                                                                                                                                                                                                                                                                                                                                                                                                                                                                                                                                                                                                                                                                                                                                                                                                                                                                          |                       | Japan (paddy soil)            | (3)       |
|                    |                                                                                                                                                                                                                                                                                                                                                                                                                                                                                                                                                                                                                                                                                                                                                                                                                                                                                                                                                                                                                                                                                                                                                                                                                                                                                                                                                                                                                                                                                                                                       | New Jersey (sediment) | (4)                           |           |

**Table S4.** Distribution of the previously described *arrA* gene sequences from the Cache Valley Basin, Utah.

| Clusters           | <i>ArrA</i> gene clone sequences                                                                                                                                                                                                                                                                                                                                                                                                                                                                                                                                                                                                                                                                                                                                                                                                                                                                                                                                                                                                                                                                                                                                                                                                                                                                                                                                                                                                                                                                                                                                                                                                                                                                                                                                                                                                                                                                                                                                                                                                                                                                                                                                                                                                                                                                                                                                                                                                                                                                                                                                                                                                                                                                                                                                                                                                                                                                                                                                                                                                                                                                                                                                                                                                                                                           | Identity (%) | Location                 |
|--------------------|--------------------------------------------------------------------------------------------------------------------------------------------------------------------------------------------------------------------------------------------------------------------------------------------------------------------------------------------------------------------------------------------------------------------------------------------------------------------------------------------------------------------------------------------------------------------------------------------------------------------------------------------------------------------------------------------------------------------------------------------------------------------------------------------------------------------------------------------------------------------------------------------------------------------------------------------------------------------------------------------------------------------------------------------------------------------------------------------------------------------------------------------------------------------------------------------------------------------------------------------------------------------------------------------------------------------------------------------------------------------------------------------------------------------------------------------------------------------------------------------------------------------------------------------------------------------------------------------------------------------------------------------------------------------------------------------------------------------------------------------------------------------------------------------------------------------------------------------------------------------------------------------------------------------------------------------------------------------------------------------------------------------------------------------------------------------------------------------------------------------------------------------------------------------------------------------------------------------------------------------------------------------------------------------------------------------------------------------------------------------------------------------------------------------------------------------------------------------------------------------------------------------------------------------------------------------------------------------------------------------------------------------------------------------------------------------------------------------------------------------------------------------------------------------------------------------------------------------------------------------------------------------------------------------------------------------------------------------------------------------------------------------------------------------------------------------------------------------------------------------------------------------------------------------------------------------------------------------------------------------------------------------------------------------|--------------|--------------------------|
| <b>Cluster I</b>   | NP8_GW_33 (KF009987.1), NP8_GW_40 (KF009988.1), NP8_GW+G_29, NP8_GW+G_12 (KF009985.1), NP8_GW+G_32, NP3_GW+G_9 (KF009983.1), NP3_GW+G_10 (KF009982.1), NP8_GW+G_16, NP8_GW+G_20 (KF009981.1), NP3_GW+G_29, NP3_GW+G_27 (KF009984.1), NP8_GW+G_45 (NP8_GW+G_27 (KF009986.1), NP1_GW_57 (KF009990.1), NP1_GW_16, NP1_GW_23 (KF009991.1), NP1_GW+G_12, NP3_GW_19, NP3_GW_27 (KF009989.1), NP1_GW_51, NP1_GW_1 (KF009993.1), NP1_GW+G_15 (KF009992.1), NP8_GW+G_33                                                                                                                                                                                                                                                                                                                                                                                                                                                                                                                                                                                                                                                                                                                                                                                                                                                                                                                                                                                                                                                                                                                                                                                                                                                                                                                                                                                                                                                                                                                                                                                                                                                                                                                                                                                                                                                                                                                                                                                                                                                                                                                                                                                                                                                                                                                                                                                                                                                                                                                                                                                                                                                                                                                                                                                                                             | 85-100%      | Cache Valley Basin, Utah |
| <b>Cluster II</b>  | NP3_GW_2, NP3_GW+G_20 (KF010068.1), NP3_GW_6 (KF010072.1), NP3_GW_14, NP3_GW_34, NP3_GW+G_17 (KF010077.1), NP1_GW_15, NP3_GW+G_30, NP3_GW_41 (KF010080.1), NP1_GW+G_6 (KF010093.1), NP3_GW_31 (KF010071.1), NP3_GW+G_23 (KF010069.1), NP3_GW_50, NP8_GW+G_22 (KF010078.1), NP3_GW+G_3 (KF010088.1), NP3_GW_8 (KF010073.1), NP3_GW_13, NP3_GW_23, NP3_GW_35 (KF010085.1), NP1_GW+G_4 (KF010076.1), NP3_GW+G_6 (KF010084.1), NP3_GW_26, NP8_GW+G_15, NP3_GW_32, NP3_GW+G_45 (KF010083.1), NP3_GW+G_24 (KF010082.1), NP3_GW+G_8 (KF010091.1), NP8_GW+G_2, NP8_GW+G_46, NP1_GW_17, NP3_GW_1 (KF010086.1), NP3_GW+G_4 (KF010094.1), NP3_GW_28, NP3_GW_30, NP3_GW_11, NP3_GW_10 (KF010081.1), NP3_GW_39, NP3_GW_4 (KF010087.1), NP3_GW+G_36, NP8_GW+G_39, NP3_GW+G_46, NP3_GW+G_15 (KF010090.1), NP3_GW_43 (KF010079.1), NP8_GW+G_47 (KF010074.1), NP3_GW+G_16, NP3_GW_21 (KF010070.1), NP8_GW+G_5 (KF010089.1), NP3_GW_46, NP3_GW_12 (KF010067.1), NP3_GW_40, NP8_GW+G_17 (KF010077.1), NP3_GW_36, NP3_GW_17, NP3_GW_7, NP3_GW_16 (KF010042.1), NP3_GW_20 (KF010043.1), NP3_GW_49 (KF010046.1), NP3_GW_44 (KF010045.1), NP3_GW_22 (KF010047.1), NP3_GW_38, NP3_GW_18, NP8_GW_7 (KF010065.1), NP8_GW_22 (KF010062.1), NP1_GW_4, NP1_GW_35 (KF010049.1), NP1_GW_6, NP3_GW_5, NP3_GW_45 (KF010063.1), NP3_GW_29, NP1_GW+G_8, NP1_GW+G_27 (KF010053.1), NP1_GW_21, NP1_GW+G_43, NP1_GW+G_2 (KF010055.1), NP1_GW+G_50 (KF010058.1), NP1_GW+G_14 (KF010056.1), NP1_GW+G_29, NP1_GW+G_25, NP1_GW+G_9 (KF010060.1), NP1_GW+G_24 (KF010059.1), NP1_GW+G_38 (KF010061.1), NP1_GW+G_13 (KF010057.1), NP1_GW_25, NP1_GW_19 (KF010054.1), NP8_GW+G_41, NP3_GW+G_22, NP8_GW+G_24, NP8_GW+G_23 (KF010038.1), NP8_GW+G_28 (KF010039.1), NP3_GW_15, NP3_GW_37 (KF009996.1), NP8_GW+G_3, NP3_GW+G_37 (KF009997.1), NP8_GW+G_36, NP3_GW+G_2 (KF009998.1), NP1_GW_14 (KF010025.1), NP1_GW_54 (KF010024.1), NP1_GW+G_9 (KF010060.1), NP1_GW_12 (KF010029.1), NP1_GW_55, NP1_GW+G_39, NP1_GW+G_17, NP1_GW+G_34, NP1_GW+G_16, NP1_GW+G_5, NP1_GW+G_23, NP1_GW+G_41 (KF010027.1), NP1_GW+G_44, NP1_GW+G_10 (KF010026.1), NP1_GW+G_7 (KF010030.1), NP1_GW_56, NP1_GW+G_11, NP1_GW+G_33 (KF010033.1), NP1_GW+G_49, NP1_GW+G_40 (KF010032.1), NP1_GW+G_20 (KF010035.1), NP1_GW+G_46 (KF010034.1), NP1_GW_33 (KF010036.1), NP1_GW+G_37 (KF010031.1), NP8_GW+G_31 (KF010037.1), NP8_GW+G_10, NP3_GW+G_38, NP8_GW+G_37, NP8_GW+G_19 (KF009999.1), NP8_GW+G_7, NP8_GW+G_42 (KF010010.1), NP8_GW+G_8 (KF010006.1), NP3_GW+G_1 (KF010012.1), NP3_GW+G_18, NP1_GW+G_47 (KF010009.1), NP3_GW+G_43 (KF010001.1), NP8_GW+G_21 (KF010016.1), NP3_GW+G_34 (KF010021.1), NP8_GW+G_49 (KF010008.1), NP1_GW_26, NP3_GW+G_26, NP3_GW+G_7 (KF010017.1), NP3_GW+G_28 (KF010020.1), NP1_GW+G_21 (KF010002.1), NP3_GW+G_40 (KF010011.1), NP1_GW+G_36, NP3_GW+G_50, NP8_GW+G_4, NP1_GW+G_1, NP8_GW+G_18 (KF010000.1), NP3_GW+G_35 (KF010023.1), NP8_GW+G_35, NP8_GW+G_50 (KF010007.1), NP3_GW+G_12 (KF010019.1), NP1_GW+G_22, NP8_GW+G_48 (KF010018.1), NP3_GW+G_5, NP8_GW+G_13, NP3_GW+G_48, NP3_GW+G_41 (KF010014.1), NP1_GW_53, NP8_GW+G_26 (KF010003.1), NP3_GW+G_33, NP8_GW+G_34 (KF010015.1), NP8_GW+G_43 (KF010005.1), NP3_GW+G_39 (KF010004.1), NP3_GW+G_14 (KF010013.1), NP8_GW+G_38, NP8_GW+G_40, NP1_GW+G_42, NP1_GW_58, NP8_GW+G_14 | 85-100%      |                          |
| <b>Cluster III</b> | NP8_GW_29 (KF009949.1), NP3_GW_48 (KF009950.1), NP3_GW_47 (KF009948.1), NP8_GW_23, NP8_GW_5 (KF009963.1), NP8_GW_34 (KF009968.1), NP8_GW_41, NP8_GW_2 (KF009949.1), NP8_GW_30 (KF009972.1), NP8_GW_6 (KF009960.1), NP8_GW_21, NP8_GW_12, NP8_GW_3 (KF009958.1), NP8_GW_49, NP8_GW_26, NP8_GW_11 (KF009978.1), NP8_GW_35 (KF009967.1), NP8_GW_14 (KF009962.1), NP8_GW_38, NP8_GW_36, NP8_GW_9 (KF009974.1), NP8_GW_45 (KF009969.1), NP8_GW_28, NP8_GW_43, NP8_GW_10, NP8_GW_44 (KF009971.1), NP8_GW_25 (KF009966.1), NP8_GW_46 (KF009980.1), NP8_GW_50 (KF009965.1), NP8_GW_27, NP8_GW_39 (KF009961.1), NP8_GW_31 (KF009958.1), NP1_GW+G_48 (KF010064.1), NP1_GW+G_28 (KF010075.1), NP3_GW+G_25, NP3_GW+G_13 (KF010092.1), NP8_GW+G_25 (KF010066.1), NP3_GW_24, NP1_GW_30 (KF010052.1), NP1_GW+G_3, NP1_GW_39 (KF010051.1), NP1_GW_11 (KF010050.1), NP3_GW_25, NP3_GW+G_42, NP3_GW_33 (KF010048.1), NP8_GW_48 (KF009970.1)                                                                                                                                                                                                                                                                                                                                                                                                                                                                                                                                                                                                                                                                                                                                                                                                                                                                                                                                                                                                                                                                                                                                                                                                                                                                                                                                                                                                                                                                                                                                                                                                                                                                                                                                                                                                                                                                                                                                                                                                                                                                                                                                                                                                                                                                                                                                                                  | 85-100%      |                          |
| <b>Cluster IV</b>  | NP8_GW_15 (KF009955.1), NP1_GW_5 (KF009947.1), NP8_GW_32 (KF009977.1), NP8_GW_27, NP3_GW_9 (KF009952.1), NP3_GW_3 (KF009951.1), NP1_GW_37 (KF009946.1), NP1_GW_24, NP1_GW_27 (KF009945.1), NP3_GW_42                                                                                                                                                                                                                                                                                                                                                                                                                                                                                                                                                                                                                                                                                                                                                                                                                                                                                                                                                                                                                                                                                                                                                                                                                                                                                                                                                                                                                                                                                                                                                                                                                                                                                                                                                                                                                                                                                                                                                                                                                                                                                                                                                                                                                                                                                                                                                                                                                                                                                                                                                                                                                                                                                                                                                                                                                                                                                                                                                                                                                                                                                       | 85-100%      |                          |
| <b>Cluster V</b>   | NP1_GW_34 (KF010109), NP1_GW_3 (KF010096), NP1_GW_52NP1_GW_63 (KF010101), NP1_GW_67, NP1_GW_60 (KF010103), NP1_GW_66, NP1_GW_65, NP1_GW_40, NP1_GW_9 (KF010107), NP1_GW_8 (KF010106), NP1_GW_32 (KF010108), NP1_GW_62 (KF010102), NP1_GW+G_32 (NP1_GW_7, NP1_GW+G_45 (KF010105), NP1_GW_64 (KF010100), NP1_GW_59 (NP1_GW_61 (KF010110), NP1_GW_13 (KF010095), NP1_GW_36 (KF010097), NP1_GW_29 (NP8_GW+G_1 (NP3_GW+G_19 (NP8_GW+G_9 (KF010112), NP8_GW+G_11 (KF010111), NP3_GW+G_31 (KF010114), NP8_GW+G_44 (KF010113), NP8_GW+G_30 (NP1_GW+G_26 (KF010104), NP1_GW+G_30 (KF010098), NP1_GW+G_18 (KF010099), NP1_GW+G_31, NP1_GW_38                                                                                                                                                                                                                                                                                                                                                                                                                                                                                                                                                                                                                                                                                                                                                                                                                                                                                                                                                                                                                                                                                                                                                                                                                                                                                                                                                                                                                                                                                                                                                                                                                                                                                                                                                                                                                                                                                                                                                                                                                                                                                                                                                                                                                                                                                                                                                                                                                                                                                                                                                                                                                                                         | 85-100%      |                          |
